# Extraordinary Aggressive Behavior from the Giant Coral Reef Fish, *Bolbometopon muricatum*, in a Remote Marine Reserve

Roldan C. Muñoz<sup>1\*</sup>, Brian J. Zgliczynski<sup>2</sup>, Joseph L. Laughlin<sup>3</sup>, Bradford Z. Teer<sup>1</sup>

**1** National Marine Fisheries Service, Beaufort Laboratory, National Oceanic and Atmospheric Administration, Beaufort, North Carolina, United States of America, **2** Center for Marine Biodiversity and Conservation, Scripps Institution of Oceanography, La Jolla, California, United States of America, **3** Mariculture Hawaii LLC, Ashland, Oregon, United States of America

## Abstract

Human impacts to terrestrial and marine communities are widespread and typically begin with the local extirpation of large-bodied animals. In the marine environment, few pristine areas relatively free of human impact remain to provide baselines of ecosystem function and goals for restoration efforts. Recent comparisons of remote and/or protected coral reefs versus impacted sites suggest remote systems are dominated by apex predators, yet in these systems the ecological role of non-predatory, large-bodied, highly vulnerable species such as the giant bumphead parrotfish (*Bolbometopon muricatum*) has received less attention. Overfishing of *Bolbometopon* has led to precipitous declines in population density and avoidance of humans throughout its range, contributing to its status as a candidate species under the U. S. Endangered Species Act and limiting opportunities to study unexploited populations. Here we show that extraordinary ecological processes, such as violent headbutting contests by the world's largest parrotfish, can be revealed by studying unexploited ecosystems, such as the coral reefs of Wake Atoll where we studied an abundant population of *Bolbometopon*. *Bolbometopon* is among the largest of coral reef fishes and is a well known, charismatic species, yet to our knowledge, no scientific documentation of ritualized headbutting exists for marine fishes. Our observations of aggressive headbutting by *Bolbometopon* underscore that remote locations and marine reserves, by inhibiting negative responses to human observers and by allowing the persistence of historical conditions, can provide valuable opportunities to study ecosystems in their natural state, thereby facilitating the discovery, conservation, and interpretation of a range of sometimes remarkable behavioral and ecological processes.

**Citation:** Muñoz RC, Zgliczynski BJ, Laughlin JL, Teer BZ (2012) Extraordinary Aggressive Behavior from the Giant Coral Reef Fish, *Bolbometopon muricatum*, in a Remote Marine Reserve. PLoS ONE 7(6): e38120. doi:10.1371/journal.pone.0038120

**Editor:** Dirk Steinke, Biodiversity Institute of Ontario - University of Guelph, Canada

**Received:** February 22, 2012; **Accepted:** May 2, 2012; **Published:** June 6, 2012

This is an open-access article, free of all copyright, and may be freely reproduced, distributed, transmitted, modified, built upon, or otherwise used by anyone for any lawful purpose. The work is made available under the Creative Commons CC0 public domain dedication.

**Funding:** Support was provided by the NOAA Proactive Species Conservation Program to RCM and BJZ. The funders had no role in study design, data collection and analysis, decision to publish, or preparation of the manuscript.

**Competing Interests:** JLL is a science and aquaculture consultant at Mariculture Hawaii LLC. This does not alter the authors' adherence to all the PLoS ONE policies on sharing data and materials.

\* E-mail: roldan.munoz@noaa.gov

## Introduction

For large-bodied species that are generally first to be extirpated following human contact [1,2], no-take protected areas and remote locations relatively free of human impact can harbor extraordinary ecological processes. In the marine environment, few pristine areas unaffected by human activities such as fisheries exploitation remain to provide baselines of ecosystem function and goals for restoration efforts [3]. Recent comparisons of remote and/or protected coral reefs versus impacted sites suggest remote systems are dominated by apex predators [4], yet the ecological role in these systems of non-predatory, large-bodied, highly vulnerable species such as the giant bumphead parrotfish (*Bolbometopon muricatum*) has received less attention.

*Bolbometopon* is the largest herbivorous fish on coral reefs, reaching 150 cm total length (TL) and over 75 kg total weight [5]. It is slow-growing and long-lived with delayed reproduction and low replenishment rates [6,7,8]. As a result, even moderate levels of exploitation have led to severe declines in size-structure and abundance of populations throughout much of its range [9,10,11].

In addition, *Bolbometopon* often sleeps and feeds in large groups in shallow water and shows strong site fidelity, making it highly vulnerable to exploitation by night spearfishing and netting of daytime feeding schools [12,13]. For example, night spearfishing increased with the advent of underwater flashlights in the 1970's, and in the western Solomon Islands led to overexploitation and the disappearance of sleeping aggregations that had persisted and supported subsistence fishing for generations [14]. Overfishing has led to a general avoidance of humans; it is known as the wariest of parrotfishes and in most locations individuals are difficult to approach underwater [15]. *Bolbometopon* was listed as Vulnerable in 2007 by the International Union for Conservation of Nature (IUCN), and became a candidate species under the U. S. Endangered Species Act in 2010.

One location where the ecological role of *Bolbometopon* has been studied is Australia's Great Barrier Reef (GBR). The GBR has no commercial fisheries for parrotfishes. As such, these reefs support healthy populations of giant bumphead parrotfish where schools of 30–50 individuals can be observed regularly [6,16]. On the GBR, individuals appear capable of bioeroding over 5 tons of reef

carbonate each year [16]. Because of its large size, feeding rates, and schooling behavior, *Bolbometopon* may play a keystone role as a major coral consumer and bioeroder on coral reefs. In overfished locations, negative effects may include significant disruption to coral community structure, reductions in reef structural stability via invasive erosion by echinoids, and dramatic reductions in sediment transport [16]. Given *Bolbometopon*'s vulnerability to overexploitation and ecological role, comparative studies of its biology and ecology from additional unexploited populations are urgently needed and may provide critical insights for the development of recovery and management plans throughout its range. We studied spawning site characteristics and reproductive behavior of such a population at Wake Atoll, a U. S. Marine National Monument where great abundances of *Bolbometopon* can be commonly observed (Fig. 1a). On its spawning grounds, we witnessed spectacular displays of aggressive behavior between males which we describe here.

## Results and Discussion

While observing large aggregations of *Bolbometopon* in ~7 m of water, we heard loud jarring sounds and confirmed they arose from violent impacts between males engaged in repeated, ritualized headbutting behavior (Fig. 1, Video S1, Video S2). During headbutting bouts, males utilized their caudal fins to rapidly collide with their cephalic humps, immediately followed by

fast swimming in a semicircle where each fish tried to bite the back and flank of its opponent (Fig. 1d). Following circling, fish swam apart in opposite directions and then turned again face to face to initiate additional collisions. Impact sounds and headbutting were documented on multiple occasions (five and two separate days, respectively) from approximately 0630–0815 h, coincided (in all but one case) with days where we also observed spawning, and were only observed or heard in locations where spawning was also observed. During our study sunrise occurred from 0633–0637 h.

To our knowledge, no scientific documentation of ritualized headbutting exists for marine fishes. *Bolbometopon* is the world's largest parrotfish and is among the largest of coral reef fishes. How could this dramatic aspect of its social and reproductive behavior have gone unnoticed? We propose two reasons: 1) Low population densities resulting from overfishing dampen competition for resources (females or spawning territories) and/or disrupt the social system [17] so that headbutting contests are uncommon and no longer advantageous. 2) Headbutting contests are common, but negative responses to humans in exploited populations preclude observations of natural behavior. Quantitative estimates of historical abundance are not readily available for *Bolbometopon*, but numerous sources employing indigenous ecological knowledge indicate that precipitous declines in giant bumphead parrotfish populations and decreases in catches correspond with increases in fishing pressure via the advent of spear guns and underwater flashlights [11,13,18,19]. Reports include catching “250 in one

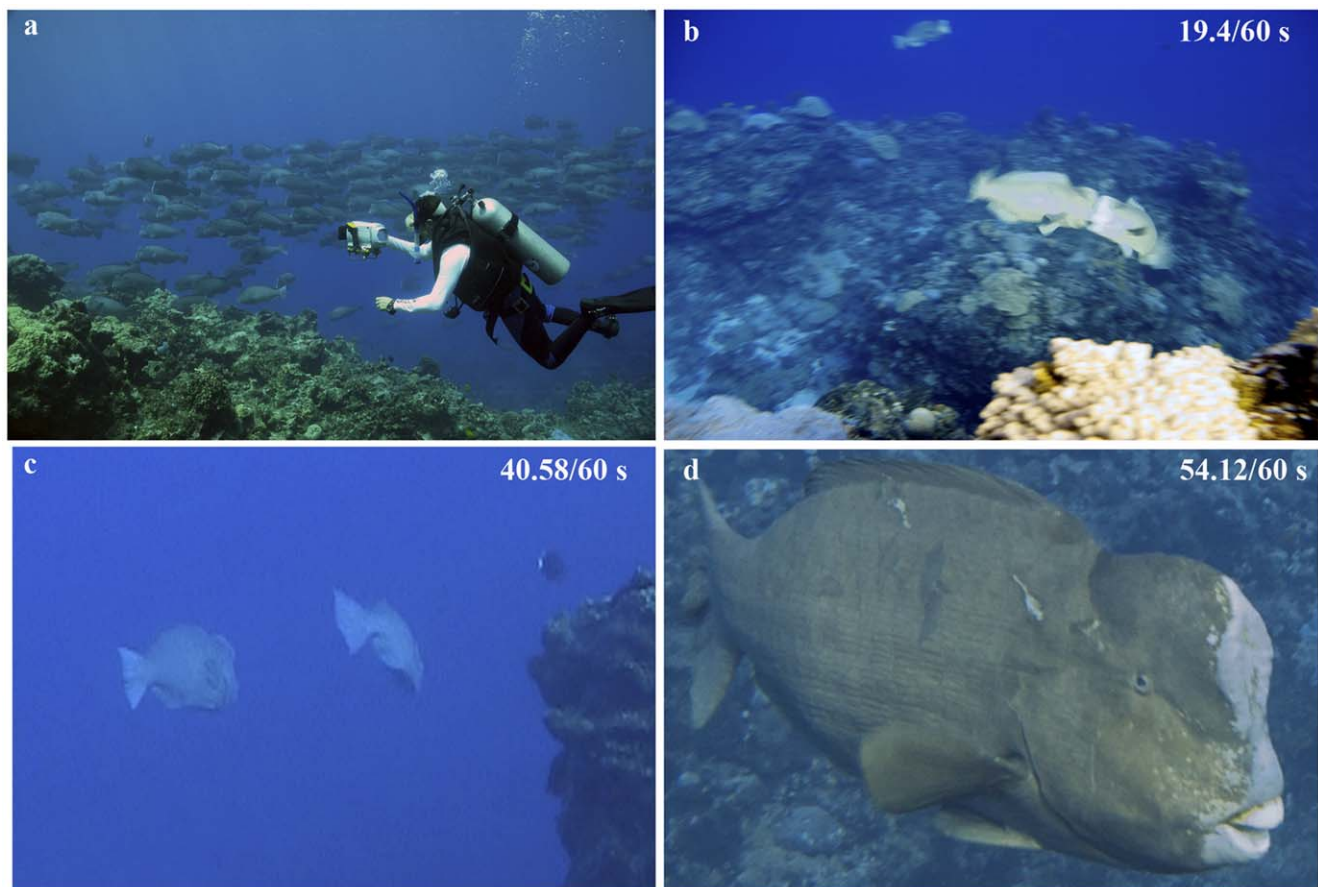

**Figure 1.** *Bolbometopon muricatum* at Wake Atoll. (a) Partial spawning aggregation of *Bolbometopon* consisting of 246 individuals. (b) Second headbutting impact. Time corresponds with video. (c) Capitulation by subordinate male (on right) rapidly fleeing the area with use of caudal fin following fourth charge. (d) Dominant male showing scale damage on back and side following headbutting bout.  
doi:10.1371/journal.pone.0038120.g001

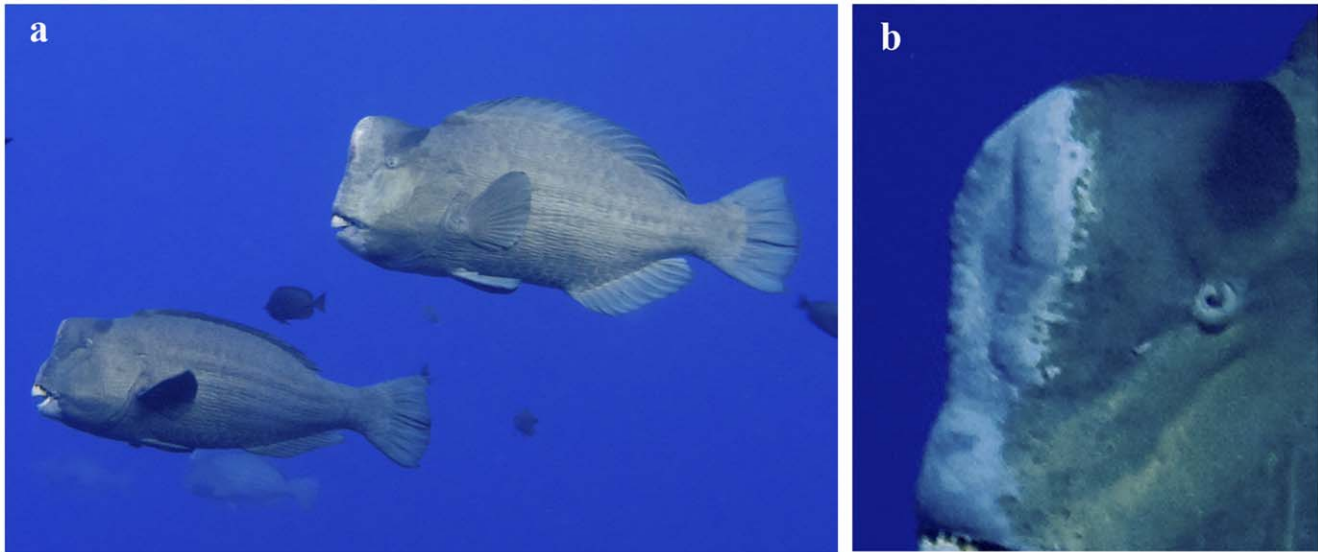

**Figure 2. Sexual dimorphism in *Bolbometopon muricatum*.** (a) Female *Bolbometopon* (lower fish) and male (upper), illustrating dimorphic forehead profile which slopes caudal to beak in females but is nearly parallel with beak in males. Males are also typically larger than females [8]. All observations of courtship and spawning that we observed were between dimorphic fish, suggesting that sex can be determined in the field based on a combination of morphology and behavior [37,38]. This assumes that most female fish interacting with morphological and behavioral males are indeed female (but see [8,37,39, Muñoz et al. in prep]). (b) Detail of male forehead showing ossified ridge characteristic of large males. The ossified ridge and cephalic hump are reduced in females. doi:10.1371/journal.pone.0038120.g002

night of spearing in shallow water, could catch the whole school on scuba in the 1970's, and after 1975, 30–50 fish per trip, and nowadays very few.” Another indirect mechanism used to estimate historical numbers is to compare *Bolbometopon* densities relative to areas of low human population density or exploitation levels [11,12,20]. With this approach, unexploited areas appear to support 4–48 fish per ha compared with no individuals observed in areas of heavy exploitation.

We hypothesize that geographic isolation and the lack of fisheries exploitation allow historical population densities and traditional spawning sites of *Bolbometopon* to persist. At sites where *Bolbometopon* are abundant, intense competition [21], sexual selection, and aggressive headbutting contests can be observed. In addition, the protected status of *Bolbometopon* at Wake Atoll results in neutral responses to divers, allowing the unexploited behavioral ecology of this threatened species to be studied.

The context of headbutting in *Bolbometopon* appears similar to the well-known male-male aggressive contests in cetartiodactyls (even-toed ungulates and cetaceans), examples of intrasexual selection where males establish dominance hierarchies or defend territories before mating [22]. As in cetartiodactyls and aggressive contests in general, the physical act of headbutting is likely on the extreme end of a continuum of aggression, with most contests being settled with non-contact displays. For example, male red deer initially roar to settle contests, then proceed to parallel walks, and only later move to violent headbutting/interlocking antlers that carry potential serious costs [23]. We witnessed far more male-male parallel swim displays than we heard impact sounds.

Though rumored to use their forehead to ram corals prior to ingestion [15], the enlarged cephalic hump of *Bolbometopon* may be a classic example of a secondary sexual characteristic resulting from sexual selection (Fig. 2a), such as the massive horns in male bighorn sheep (*Ovis canadensis*). In addition, *Bolbometopon* males exhibit what appears to be an “ossified ridge” on the forehead (Fig. 2b) that may serve a similar function as the cranial appendages of artiodactyls. Any correlations between male hump,

body size, and mating success remain to be determined. Freshwater cyprinid (minnows) and mormyrid (elephantfishes) species are reported to headbutt, but males do not display morphological characters (cranial appendages) associated with headbutting (but see breeding tubercles) [24,25,26]. In addition, physical contact in these fishes is not confined to the forehead but may also be directed at the body or tail.

Density-dependent alternative mating systems are well known in labroid fishes, but many alternatives only appear at elevated population densities [27] likely resembling conditions in which the systems evolved. Since historical densities have become exceedingly rare for large-bodied species, some alternatives may seldom be observed (a single observation of headbutting by *Bolbometopon* was reported in a recreational dive blog from the Red Sea, an area where *Bolbometopon* is reported to be locally abundant, [11,28]), and odd morphologies will remain difficult to interpret. Our observations of aggressive headbutting by *Bolbometopon* at Wake Atoll underscore that remote locations and marine reserves, by inhibiting negative responses to human observers and by allowing the persistence of historical conditions, can provide vital opportunities to study ecosystems in their natural state, thereby facilitating the discovery, conservation, and interpretation of a range of behavioral phenotypes.

## Materials and Methods

Permission to conduct field research at Wake Island was granted by Eureka T. Dotson, Major, United States Air Force, Commander, DET 1, 611 ASG, PO Box 68, Wake Island, HI, 96898. All research was conducted in accordance with the Animal Welfare Act (AWA) and with the U.S. Government Principles for the Utilization and Care of Vertebrate Animals Used in Testing, Research, and Training (USGP) OSTP CFR May 20, 1985, Vol.50, No. 97. The study was conducted on free-living wild animals in their natural habitat and solely involved observations of animals and noninvasive measurements.



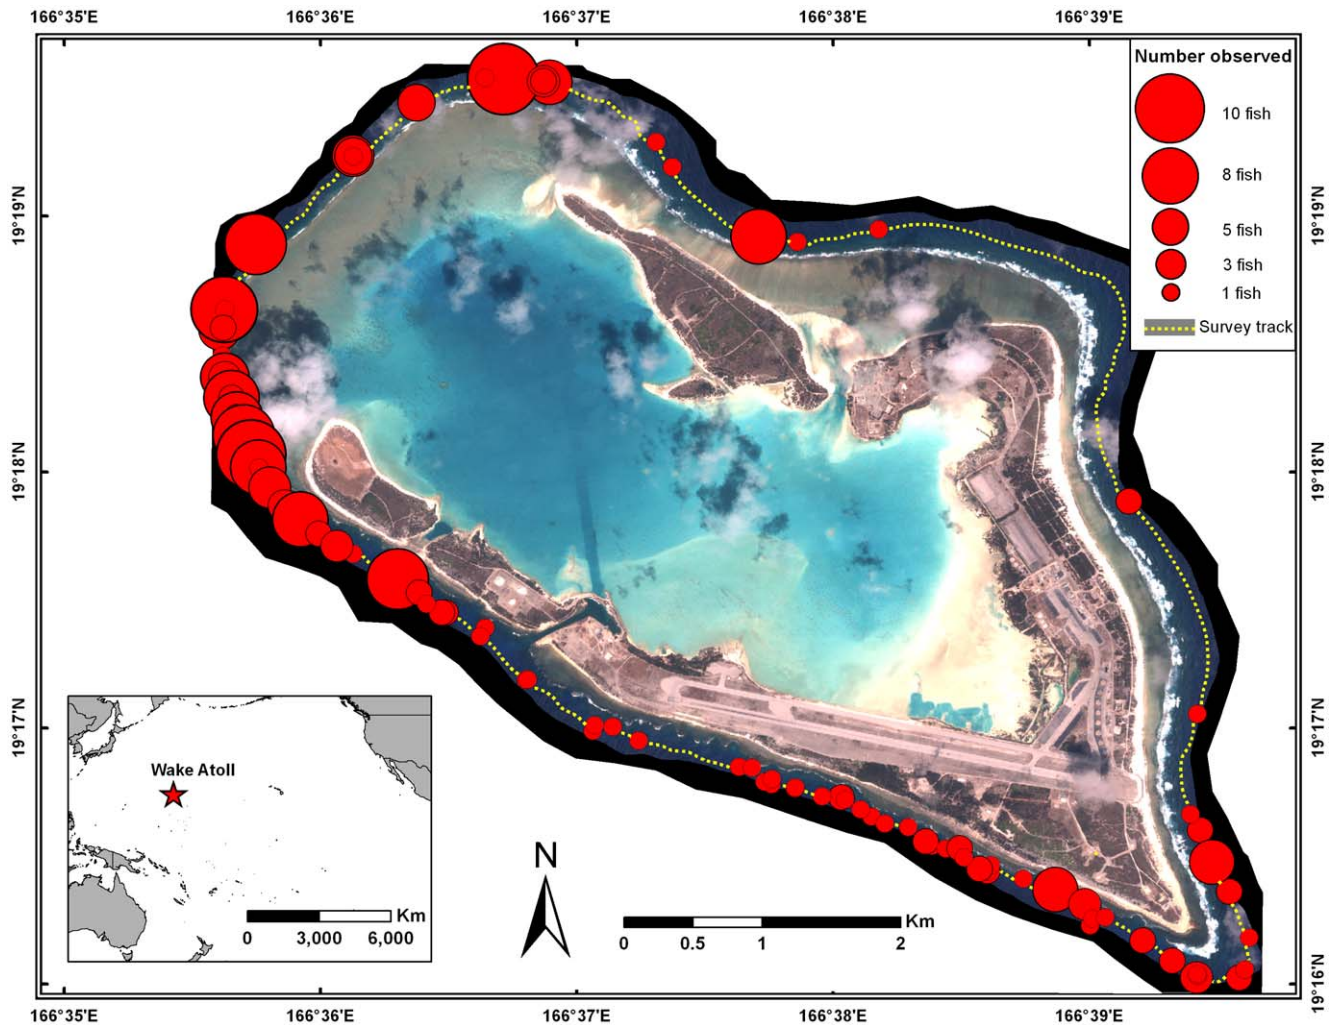

**Figure 3. Distribution of *Bolbometopon muricatum* at Wake Atoll observed during towed-diver surveys from 2005–2009.** Surveys were conducted on a biennial basis by the NOAA Coral Reef Ecosystem Division. Circles indicate the total number of fish observed at each location around the atoll.

doi:10.1371/journal.pone.0038120.g003

Wake Atoll (19° 18' N, 166° 37' E), is a U. S. Pacific Remote Island, National Wildlife Refuge, and recently designated Marine National Monument co-managed by the U. S. Department of Defense (DOD) and the U. S. Fish and Wildlife Service (USFWS). We conducted 100 h of snorkel and scuba observations of giant bumphead parrotfish (*Bolbometopon muricatum*, Labridae, Scarinae, [29]) from 12–25 August 2011. Visibility ranged from 4.5 m to >30 m, depending on the tidal state (ebbing tide drained the atoll lagoon, decreasing visibility). General underwater conditions can be found in Lobel and Lobel [30]. We chose study sites along the outer fore reef based on the densities of *Bolbometopon* from previous towed-diver surveys by the U. S. National Marine Fisheries Service Coral Reef Ecosystem Division, which conducts biennial surveys of the coral reef ecosystem at Wake Atoll (Fig. 3). Detailed survey methods can be found in Richards et al. [31]. Briefly, divers maneuvered towboards 1–3 m above the substrate and tallied all fishes  $\geq 50$  cm TL that entered a 10 m wide swath centered on and forward of the diver. Surveys were 50 min in duration and observational data were recorded in 10 5-min segments. A total of 51 towed-diver surveys were completed during research cruises in 2005, 2007, and 2009. Surveys circumnavigated the island and over 29.64 ha of reef area were surveyed around Wake Atoll

during each survey year. The spatial consistency of increased *Bolbometopon* densities in the SW side of the island across years suggests that *Bolbometopon* may form true fish spawning aggregations at Wake Atoll (*sensu* Domeier [32]); we will present additional analyses that further examine this possibility in a related paper (Muñoz et al. in prep). Because of its remote location and its administration by DOD (since 1934) and USFWS, commercial fishing at Wake Atoll has been excluded and all fishing for *Bolbometopon* is prohibited, so populations can be considered pristine (island-wide mean of 2.97 individuals per ha [SE 0.96], Fig. 1a) [33,34].

We recorded spawning behavior of *Bolbometopon* using high definition video (Canon Vixia HF S200, Sony HDR-HC9), and still photography (Nikon D300, Canon G9). Observations took place during daylight hours using snorkel, scuba, and towed-diver surveys and were geographically logged with a hand-held GPS [35,36].

### Supporting Information

**Video S1 Ritualized headbutting of *Bolbometopon muricatum* at Wake Atoll.** We captured an entire headbutting bout

on high definition video, consisting of four, successive charges between two males. The first three resulted in impact (~5.8/60 s [audible but outside field of view], 19.4/60 s, 26.58/60 s), and the fourth charge resulted in the subordinate male fleeing the contest. Full sequence at normal speed. Given the distinctive sounds from headbutting, once identified, spawning grounds could be monitored with Ecological Acoustic Recorders [40] to assess reproductive effort and aid in the management of this threatened species. (MP4)

**Video S2 Ritualized headbutting of *Bolbometopon muricatum* at Wake Atoll.** We captured an entire headbutting bout on high definition video, consisting of four, successive charges between two males. This video shows detail of charges presented in Video S1 at half speed. (MP4)

## References

- Jackson JBC, Kirby MX, Berger WH, Bjorndal KA, Botsford LW, et al. (2001) Historical overfishing and the recent collapse of coastal ecosystems. *Science* 293: 629–638.
- Morrison JC, Sechrest W, Dinerstein E, Wilcove DS, Lamoreux JF (2007) Persistence of large mammal faunas as indicators of global human impacts. *Journal of Mammalogy* 88: 1363–1380.
- Knowlton N, Jackson JBC (2008) Shifting baselines, local impacts, and global change on coral reefs. *Plos Biology* 6: 215–220.
- DeMartini EE, Friedlander AM, Sandin SA, Sala E (2008) Differences in fish-assemblage structure between fished and unfished atolls in the northern Line Islands, central Pacific. *Marine Ecology-Progress Series* 365: 199–215.
- Gladstone W (1986) Spawning behavior of the bumphead parrotfish *Bolbometopon muricatum* at Yonge Reef, Great Barrier Reef. *Japanese Journal of Ichthyology* 33: 326–328.
- Bellwood DR, Choat JH (2011) Dangerous demographics: the lack of juvenile humphead parrotfishes *Bolbometopon muricatum* on the Great Barrier Reef. *Coral Reefs* 30: 549–554.
- Choat JH, Robertson DR (2002) Age-based studies on coral reef fishes. In: Sale PF, ed. *Coral reef fishes: Dynamics and diversity in a complex ecosystem*. San Diego: Academic Press. pp 57–80.
- Hamilton RJ, Adams S, Choat JH (2008) Sexual development and reproductive demography of the green humphead parrotfish (*Bolbometopon muricatum*) in the Solomon Islands. *Coral Reefs* 27: 153–163.
- Aswani S, Hamilton RJ (2004) Integrating indigenous ecological knowledge and customary sea tenure with marine and social science for conservation of bumphead parrotfish (*Bolbometopon muricatum*) in the Roviana Lagoon, Solomon Islands. *Environmental Conservation* 31: 69–83.
- Donaldson TJ, Dulvy NK (2004) Threatened fishes of the world: *Bolbometopon muricatum* (Valenciennes 1840) (Scaridae). *Environmental Biology of Fishes* 70: 373.
- Dulvy NK, Polunin NVC (2004) Using informal knowledge to infer human-induced rarity of a conspicuous reef fish. *Animal Conservation* 7: 365–374.
- Hamilton RJ, Choat JH (2012) Bumphead Parrotfish – *Bolbometopon muricatum*. In: Sadovy de Mitcheson Y, Colin PL, eds. *Reef Fish Spawning Aggregations: Biology, Research and Management, Fish & Fisheries Series: Springer, Springer Science+Business Media B.V.* pp 490–496.
- Johannes RE (1981) *Words of the lagoon: fishing and marine lore in the Palau District of Micronesia*. Berkeley/Los Angeles/London: University of California Press.
- Hamilton RJ (2004) The demographics of bumphead parrotfish (*Bolbometopon muricatum*) in lightly and heavily fished regions of the Western Solomon Islands. [Ph.D. thesis]. Dunedin, New Zealand: University of Otago. 273 p.
- Myers RF (1999) *Micronesian reef fishes: A field guide for divers and aquarists*. Barrigada: Coral Graphics, Guam Main Facility. 330 p.
- Bellwood DR, Hoey AS, Choat JH (2003) Limited functional redundancy in high diversity systems: resilience and ecosystem function on coral reefs. *Ecology Letters* 6: 281–285.
- Muñoz RC, Burton ML, Brennan KJ, Parker RO (2010) Reproduction, habitat utilization, and movements of hogfish (*Lachnolaimus maximus*) in the Florida Keys, U. S. A.: comparisons from fished versus unfished habitats. *Bulletin of Marine Science* 86: 93–116.
- Hamilton RJ, Paiva F, Aitsi J, Potuku P, Siota C, et al. (2010) Northern Bougainville Marine Resource Assessment, Autonomous Region of Bougainville. Technical report of survey conducted from the 1st–25th November 2008. A report by the Marine Program of the Asia Pacific Conservation Region, The Nature Conservancy. 2/ 10.
- Sadovy YJ (2007) Report on current status and exploitation history of reef fish spawning aggregations in Palau. *Western Pacific Fishery Survey Series: Society for the Conservation of Reef Fish Aggregations, Volume 3. SCRFA and the Palau Conservation Society*.
- Bellwood DR, Hoey AS, Hughes TP (2012) Human activity selectively impacts the ecosystem roles of parrotfishes on coral reefs. *Proceedings of the Royal Society B-Biological Sciences* 279: 1621–1629.
- Roberts CM, Polunin NVC (1991) Are marine reserves effective in management of reef fisheries? *Reviews in Fish Biology and Fisheries* 1: 65–91.
- Lusseau D (2003) The emergence of cetaceans: phylogenetic analysis of male social behaviour supports the Cetartiodactyla clade. *Journal of Evolutionary Biology* 16: 531–535.
- Clutton-Brock TH, Albon SD (1979) The roaring of red deer and the evolution of honest advertisement. *Behaviour* 69: 145–170.
- Kortet R, Taskinen J, Vainikka A, Ylonen H (2004) Breeding tubercles, papillomatosis and dominance behaviour of male roach (*Rutilus rutilus*) during the spawning period. *Ethology* 110: 591–601.
- Phillips CT, Gibson JR, Fries JN (2011) Spawning behavior and nest association by *Dianda diaboli* in the Devils River, Texas. *Southwestern Naturalist* 56: 108–112.
- Terleph TA (2004) The function of agonistic display behaviours in *Gnathonemus petersii*. *Journal of Fish Biology* 64: 1373–1385.
- Warner RR, Hoffman SG (1980) Local population size as a determinant of mating system and sexual composition in two tropical reef fishes (*Thalassoma* spp.). *Evolution* 34: 508–518.
- Anonymous (2009) Southern Sudan Odyssey. *DiverNet-Diver Magazine* online and much more. Available: [http://www.divernet.com/Travel\\_Features/red\\_sea/302280/southern\\_sudan\\_odyssey.html](http://www.divernet.com/Travel_Features/red_sea/302280/southern_sudan_odyssey.html). Accessed 2012 May 7.
- Westneat MW, Alfaro ME (2005) Phylogenetic relationships and evolutionary history of the reef fish family Labridae. *Molecular Phylogenetics and Evolution* 36: 370–390.
- Lobel PS, Lobel LK (2008) Aspects of the biology and geomorphology of Johnston and Wake atolls, Pacific Ocean. In: Riegl BM, Dodge RE, eds. *Coral reefs of the USA*. Berlin: Springer. pp 655–689.
- Richards BL, Williams ID, Nadon MO, Zgliczynski BJ (2011) A towed-diver survey method for mesoscale fishery-independent assessment of large-bodied reef fishes. *Bulletin of Marine Science* 87: 55–74.
- Domeier M (2012) Revisiting Spawning Aggregations: Definitions and Challenges. In: Sadovy de Mitcheson Y, Colin PL, eds. *Reef Fish Spawning Aggregations: Biology, Research and Management, Fish & Fisheries Series: Springer, Springer Science+Business Media B.V.* pp 1–20.
- Lobel PS, Lobel LK (2004) Annotated checklist of the fishes of Wake Atoll. *Pacific Science* 58: 65–90.
- Zgliczynski BJ, Williams ID, Schroader R, Nadon MO, Richards BL, et al. (In Review) Distribution and abundance of IUCN Red-listed coral reef fishes in the US Pacific Islands. *Coral Reefs*.
- Nanami A, Yamada H (2008) Size and spatial arrangement of home range of checkered snapper *Lutjanus decussatus* (Lutjanidae) in an Okinawan coral reef determined using a portable GPS receiver. *Marine Biology* 153: 1103–1111.
- Colin PL (2012) Studying and Monitoring Aggregating Species. In: Sadovy de Mitcheson Y, Colin PL, eds. *Reef Fish Spawning Aggregations: Biology, Research and Management, Fish & Fisheries Series: Springer, Springer Science+Business Media B.V.* pp 285–329.
- Warner RR, Robertson DR (1978) Sexual patterns in the labroid fishes of the Western Caribbean, I: The wrasses (Labridae). *Smithsonian Contributions to Zoology* 254: 1–27.
- Miranda A, Almeida OG, Hubbard PC, Barata EN, Canario AVM (2005) Olfactory discrimination of female reproductive status by male tilapia (*Oreochromis mossambicus*). *Journal of Experimental Biology* 208: 2037–2043.
- Suzuki S, Toguchi K, Makino Y, Kuwamura T, Nakashima Y, et al. (2008) Group spawning results from the streaking of small males into a sneaking pair: male alternative reproductive tactics in the threespot wrasse *Halichoeres trimaculatus*. *Journal of Ethology* 26: 397–404.

## Acknowledgments

We thank J. Fleury, T. Dotson, J. Gehlke, M. Spillane, Chugach Support Services Wake Airfield staff, and the 611<sup>th</sup> ASG, USAF for facilitating the research. H. Choat and P. Colin provided invaluable advice on locating spawning sites. P. Lobel provided logistical advice for working on Wake Atoll. J. Vander Pluym, C. Price, T. Kellison, A. Hohn, and R. Warner provided helpful comments on the manuscript. The findings and conclusions are those of the authors and do not necessarily represent the views of NOAA.

## Author Contributions

Wrote the paper: RCM BJZ. Conceived and designed the study: RCM BJZ. Collected the data: RCM BJZ JLL BZT. Reviewed and edited the manuscript: RCM BJZ JLL BZT.

40. Lammers MO, Brainard RE, Au WWL, Mooney TA, Wong KB (2008) An ecological acoustic recorder (EAR) for long-term monitoring of biological and anthropogenic sounds on coral reefs and other marine habitats. *Journal of the Acoustical Society of America* 123: 1720–1728.
